1 **Engineered transfer RNAs for suppression of premature termination codons**

2

3

4 John D. Lueck<sup>1</sup>, Jae Seok Yoon<sup>2</sup>, Alfredo Perales-Puchalt<sup>3</sup>, Adam L. Mackey<sup>1</sup>, Daniel T.  
5 Infield<sup>1</sup>, Mark A. Behlke<sup>4</sup>, Marshall R. Pope<sup>1</sup>, David B. Weiner<sup>3</sup>, William R. Skach<sup>2,5</sup>,  
6 Paul B. McCray, Jr.<sup>6</sup> and Christopher A. Ahern<sup>1</sup>

7

8

9 <sup>1</sup> Department of Molecular Physiology and Biophysics, Iowa Neuroscience Institute, Carver College  
10 of Medicine, University of Iowa, Iowa City, IA, 52242, USA.

11 <sup>2</sup> Cystic Fibrosis Therapeutics Lab, Cystic Fibrosis Foundation, Lexington, MA, United States

12 <sup>3</sup> The Wistar Institute, Philadelphia, PA

13 <sup>4</sup> Integrated DNA Technologies Inc., Coralville, IA 52241, USA

14 <sup>5</sup> Cystic Fibrosis Foundation, Bethesda, MD, United States.

15 <sup>6</sup> Stead Family Department of Pediatrics, Pappajohn Biomedical Institute, University of Iowa, Iowa  
16 City, IA, 52242, USA.

17

18

19

20

21

22

23

24

25

26 Correspondence and requests for materials should be addressed to C.A.A. (christopher-  
27 ahern@uiowa.edu) or J.D.L. (john\_lueck@URMC.rochester.edu).

28

29

## 30 **ABSTRACT**

31 Premature termination codons (PTCs) are responsible for 10-15% of all inherited disease. PTC  
32 suppression during translation offers a promising approach to treat a variety of genetic disorders, yet  
33 small molecules that promote PTC read-through have yielded mixed performance in clinical trials.  
34 We present a high-throughput, cell-based assay to identify anticodon engineered transfer RNAs  
35 (ACE-tRNA) which can effectively suppress in-frame PTCs and faithfully encode their cognate amino  
36 acid. In total, we identified ACE-tRNA with a high degree of suppression activity targeting the most  
37 common human disease-causing nonsense codons. Genome-wide transcriptome ribosome  
38 profiling of cells expressing ACE-tRNA at levels which repair PTC indicate that there are limited  
39 interactions with translation termination codons. These ACE-tRNAs display high suppression  
40 potency in mammalian cells, *Xenopus* oocytes and mice *in vivo*, producing PTC repair in multiple  
41 genes, including disease causing mutations within the cystic fibrosis transmembrane conductance  
42 regulator (*CFTR*).  
43  
44

## 45 **INTRODUCTION**

46 Premature termination codons (PTCs) arise from single nucleotide mutations that convert a  
47 canonical triplet nucleotide codon into one of three stop codons, e.g., TAG, TGA, or TAA. PTCs are  
48 often more deleterious than missense mutations because they result in the loss of protein  
49 expression. Additionally, mRNA abundance is reduced through nonsense-mediated decay (NMD)  
50 and in some cases, truncated proteins may have a dominant negative function<sup>1-3</sup>. Therefore, it is  
51 not surprising that PTCs are associated with many severe disease phenotypes, including cystic  
52 fibrosis<sup>4</sup>, Duchenne muscular dystrophy, spinal muscular atrophy<sup>5</sup>, infantile neuronal ceroid  
53 lipofuscinosis<sup>6</sup>,  $\beta$ -thalassemia<sup>7</sup>, cystinosis<sup>8</sup>, X-linked nephrogenic diabetes insipidus<sup>9</sup>, Hurler  
54 syndrome<sup>10</sup>, Usher syndrome<sup>11</sup>, and polycystic kidney disease. Additionally, nonsense mutations  
55 occur within the tumor suppressor genes *p53* and *ATM*<sup>12</sup>, further implicating their role in disease.  
56 Amino acid codons most vulnerable to PTC conversion are those with a single nucleotide  
57 substitution from a stop codon: tryptophan, tyrosine, cysteine, glutamic acid, lysine, glutamine,  
58 serine, leucine, arginine, and glycine (Supplemental Figure 1). As such, PTCs represent a unique  
59 constellation of diseases which afflict over 30 million people worldwide, accounting for 10-15% of all  
60 genetic diseases<sup>13</sup>.  
61

62 Small molecules, such as aminoglycosides<sup>14</sup>, dipeptides<sup>15</sup>, and oxadiazoles<sup>16</sup>, promote the “read-  
63 through” or “suppression” of nonsense mutations. These compounds are effective in model  
64 organisms<sup>17, 18</sup>, mammalian cell lines<sup>19</sup> and some animal disease models<sup>16, 20</sup>. However, this  
65 approach results in the encoding of a *near*-cognate amino acid<sup>21</sup>, effectively generating a missense

66 mutation at the PTC, which itself may have deleterious effects on protein folding, trafficking, and  
67 function. Furthermore, aminoglycosides are oto- and nephrotoxic<sup>22</sup>, and the first-in-class oxadiazole,  
68 Ataluren, displayed unexpectedly low efficacy in patient populations (ACT DMD Phase 3 clinical trial,  
69 NCT01826487; ACT CF, NCT02139306), thus limiting their utility as PTC therapeutics. Recent and  
70 ongoing advances in CRISPR/Cas9-mediated genome editing provides potentially a permanent  
71 solution for diseases resulting from nonsense mutations. However, aspects of this technology  
72 impart hurdles for its rapid use as a therapeutic<sup>23, 24</sup>, and these challenges are not limited to the  
73 requirement of “precision” or “personalized” diagnostics for each mutation based on the context of  
74 each patient’s genetic variability.

75

76 We sought to identify a PTC repair approach that displays the versatility of small molecules and the  
77 precision of gene editing. We investigated tRNAs to fulfill these criteria, whereby their anticodons  
78 have been engineered via mutagenesis to recognize and suppress UGA, UAA or UAG PTC codons.  
79 In order to be effective, the anticodon edited tRNAs, aka ACE-tRNAs, should still be recognized by  
80 the endogenous translation cellular machinery, including the aminoacyl-tRNA synthetase for  
81 charging the ACE-tRNA with their cognate amino acid and the eukaryotic elongation factor 1a (eEF-  
82 1 $\alpha$ ) for delivery of the charged tRNA to the ribosome, Figure 1a. Such suppressor tRNAs have been  
83 shown, in a limited manner, to rescue in frame stop codons associated with  $\beta$ -thalassemia<sup>25</sup>,  
84 xeroderma pigmentosum<sup>26</sup> and a transgenic PTC reporter gene<sup>27</sup>.

85

86 Here we show that an anti-codon editing approach is generalizable to multiple tRNA gene families,  
87 indicating that many annotated tRNA are biologically viable. Further, we demonstrate that anti-  
88 codon edited suppressor tRNA encode their cognate amino acid, lack significant interactions with  
89 termination stop codons and are efficacious *in vivo* to suppress PTC. In total, the data support the  
90 possibility that such engineered tRNA satisfy the broad requirement for coverage of disease-causing  
91 PTCs and thus represent a promising new class of RNA therapeutic agent.

92

## 93 **RESULTS**

94 The rationale of this study is rooted in the observation that there are multiple tRNA genes with  
95 unique sequences (isodecoders) for a given cognate amino acid (isoacceptors), leading to >400  
96 tRNAs annotated in the human genome (<http://lowelab.ucsc.edu/GtRNAdb/>)<sup>28, 29</sup>. We first examined  
97 tRNA genes to identify individual ACE-tRNAs which retain suppression efficacy of PTCs in  
98 mammalian cells. In order to maximize sequence coverage, we generated an all-in-one cDNA  
99 plasmid that supports both high-throughput cloning (HTC) of ACE-tRNAs and quantitative  
100 measurement of PTC suppression using luminescence following delivery to mammalian cells, Figure  
101 1b. ACE-tRNA sequence were cloned as DNA oligos into the HTC plasmid using Golden Gate

102 cloning<sup>30</sup> paired with ccdB negative selection<sup>31</sup>. This strategy produced ~100% cloning efficiency.  
103 ACE-tRNA suppression efficiency was read out from a split NanoLuc luciferase (NLuc) NanoBiT  
104 platform whereby the PTC of interest (UGA, UAA, or UAG) was introduced in-frame at the junction  
105 between the large bit and small bit domains, Figure 1b<sup>32</sup>, using a 96-well format and normalized to  
106 background obtained in NLuc-PTC expressing cells. Twenty-one glycine ACE-tRNAs were first  
107 evaluated for suppression of the UGA PTC, Figure 2, top left, column 1 (violet). A majority of the  
108 ACE-tRNA<sup>Gly</sup> sequences failed to suppress the UGA NLuc PTC, however, three Gly-tRNA<sup>UGA</sup> were  
109 identified with high suppression yields (~100-fold over background). Given the high sequence  
110 conservation among the Gly-tRNAs screened for anti-codon tolerance (Supplemental Figure 3), it  
111 would be difficult to predict *de novo* which tRNA would be most amenable to anticodon-editing.  
112

113 We next performed screens on codon-edited tRNA for the each of the possible single nucleotide  
114 mutations which could produce a disease-causing PTCs: Arg-tRNA<sup>UGA</sup>, Gln-tRNA<sup>UAA</sup>, Gln-tRNA<sup>UAG</sup>  
115 Trp-tRNA<sup>UGA</sup>, Trp-tRNA<sup>UAG</sup>, Glu-tRNA<sup>UAA</sup>, Glu-tRNA<sup>UAG</sup>, Cys-tRNA<sup>UGA</sup>, Tyr-tRNA<sup>UAG</sup>, Tyr-tRNA<sup>UAA</sup>,  
116 Ser-tRNA<sup>UAG</sup>, Leu-tRNA<sup>UAG</sup>, Leu-tRNA<sup>UAA</sup>, Lys-tRNA<sup>UAG</sup>, Lys-tRNA<sup>UGA</sup> and Ser-tRNA<sup>UAG</sup>. The  
117 enzymatic activity of NLuc was not significantly influenced by the introduced amino acid  
118 (Supplemental Figure 4), therefore owing the difference in NLuc luminescence to ACE-tRNA  
119 suppression ability. The screen identified multiple ACE-tRNAs for each of the amino acids and stop  
120 codon type, with suppression coverage for all three stop codons, Figure 2. Many of these ACE-  
121 tRNAs exhibited strong activity with >100-fold PTC suppression over background, which is  
122 significantly higher than the aminoglycosides used in this study (see below). Interestingly, some  
123 ACE-tRNAs displayed a clear preference for a particular anticodon editing, possibly reflecting altered  
124 aminoacyl-tRNA synthetase binding to the tRNA anticodon isoacceptor sequences<sup>33</sup>. For instance,  
125 tryptophan conversion to UAG suppression yielded rescue that was ten times higher than that of  
126 UGA editing of the same ACE-tRNA<sup>Trp</sup>. Yet the opposite was true for glutamine, where a clear  
127 preference was shown for UAA over UAG. Notably, in each case, multiple high performing  
128 suppressors were identified, and this was especially evident with Arg<sup>UGA</sup>, a PTC which plays an  
129 outsized role in human disease; where twenty efficient ACE-Arg<sup>UGA</sup> suppressors were identified. In  
130 other cases, such as ACE-tRNA<sup>Glu</sup>, of those which exhibited function, the suppression efficiency was  
131 roughly equal for UAA and UAG. And a similar pattern was found in ACE-tRNA<sup>Lys</sup> where encoding  
132 via UAG or UGA suppression were strongly mirrored. For Gln-tRNA<sup>UAA</sup>, the suppression activity  
133 resulted in suppression signals >2,000-fold over background. Of the ACE-tRNAs identified in the  
134 screen, the tryptophan tRNA gene family displayed the weakest suppression activity for UGA PTCs.  
135 With only 6 unique human ACE-tRNA<sup>Trp</sup> sequences available to screen, we sought to expand our  
136 UGA suppressing ACE-tRNA<sup>Trp</sup> library using tRNA from a range of species. We therefore tested  
137 UGA anticodon-editing tolerance for tryptophan tRNA genes with unique sequences from yeast, fly,

138 mouse, rat, rabbit, and frog; in addition to a miscoding A9C tRNA<sup>Trp</sup> and bacterial Hirsh Trp  
139 suppressor<sup>34-36</sup>, Supplemental Figure 5a. This effort was unsuccessful in identifying ACE-tRNA<sup>Trp</sup>  
140 UGA PTC suppression activity that exceeded that of the human ACE Trp tRNA, Supplemental  
141 Figure 5b. Overall, the tRNA screens identified multiple engineered tRNAs (for each amino acid and  
142 stop codon type) which displayed potent suppression, thus bearing general tolerance to anticodon  
143 editing.

144

145 We next established whether ACE-tRNAs identified in our screen were functionalized at the expense  
146 of aminoacylation stringency by the cognate aminoacyl-tRNA synthetase. To this end, mass  
147 spectrometry was used to examine PTC suppression in a model soluble protein, histidinol  
148 dehydrogenase (HDH), Figure 3a. A TGA codon was introduced at asparagine 94 (N94)  
149 (Supplemental Figure 6) and co-expressed in HEK293 cells in tandem with plasmids encoding  
150 Glychr19.trna2 or Trpchr17.trna39 ACE-tRNAs, the top performing glycine and tryptophan ACE-  
151 tRNA<sup>UGA</sup>, respectively. The resulting full-length, suppressed, HDH proteins were purified via a Strep-  
152 Tactin® C-terminal affinity tag and analyzed by mass spectrometry, Figures 3a (Supplemental  
153 Figure 6). Subsequent searches of the data identified the modification of Asn to Trp (+72 Da) for Trp  
154 chr17.trna39 and (-57 Da) for Glychr19.trna2, thus confirming the faithful encoding of the cognate  
155 amino acid for each ACE-tRNA type. Importantly, in each case >98% of the peptide identified at the  
156 HDH p.N94X site had the encoded cognate tryptophan and glycine. Further, both ACE-tRNAs  
157 retained selectivity for the UGA stop codon, over UAA and UAG, Figure 3b (ACE-tRNA<sup>Gly</sup>) and  
158 Supplemental Figure 7 (ACE-tRNA<sup>Trp</sup>). Lastly, when transiently expressed, the ACE-tRNA<sup>Gly</sup>  
159 outperformed the conventional small molecule suppressors gentamicin (40 µM) and G418 (140 µM)  
160 in their ability to suppress NLuc-UGA stably expressed in HEK293 cells, Figure 3c. The same was  
161 true even for ACE-tRNA<sup>Trp</sup>, which had a lower suppression efficiency yet exceeded PTC rescue  
162 compared to G418, Supplemental Figure 8.

163

164 We next raised the question of whether ACE-tRNAs that show efficacious suppression of premature  
165 stop codons may also induce global readthrough of native stop codons. To address this potential “off  
166 target” suppression, a transcriptome-wide quantitative profile of actively engaged ribosomes on all  
167 cellular transcripts was obtained by generating libraries of ribosome footprints from HEK293 cells  
168 expressing exogenous ACE-tRNAs or a control mock plasmid (puc57GG). Streptomycin was  
169 removed from the growth media to prevent readthrough artifacts. For comparison, we also generated  
170 the ribosome footprint library from cells in the presence or absence of G418 (150 µM, 48 h). Figure  
171 4a shows ribosome footprint densities of G418 and five ACE-tRNAs compared against controls  
172 (log<sub>2</sub>-fold change) on 3'UTR regions. Only transcripts with a minimum threshold of 5 RPKM in the

173 coding sequence and 0.5 RPKM in the 3'UTR in two replicate libraries were included for the  
174 quantitation comparison (254 transcripts in G418 and 495-748 transcripts in ACE-tRNAs). In this  
175 system, G418 had no observable effect on transcriptome-wide 3'UTR ribosome density for any of  
176 the three endogenous stop codon groups. ACE-tRNAs examined here had no detectable change of  
177 3'UTR ribosome density with the exception of ACE-tRNA Gln-UAA and Arg-UGA which induced  
178 approximately a 2-fold increase in 3'UTR ribosome density for the cognate stop codon  
179 complimentary to the ACE-tRNA anticodon. Understanding the biological significance of 2-fold  
180 readthrough of protein stops will require further study, but this effect is substantially lower compared  
181 to the 100- to 1000-fold suppression of PTC for the same ACE-tRNA.

182  
183 Multiple in-frame stop codons are frequently found at the end of genes<sup>37-39</sup> and may cause a minor  
184 difference in overall 3'UTR ribosome density for ACE-tRNA and G418 treatment. We therefore  
185 examined ribosome occupancy at each nucleotide in the 3'UTR within a 60 nt region downstream of  
186 the stop codons. Figure 4b demonstrates the ribosome occupancy surrounding native stop codons  
187 for each nucleotide within the region from -35 to +65 nt relative to the first nucleotide of stop codon.  
188 Reads were normalized per total million-mapped reads, compared against control cells, and reported  
189 as a log2-fold change as in panel A. More than 5,200 transcripts were mapped to at least 1 footprint  
190 in the region of interest. ACE-tRNA Gln-UAA and Arg-UGA showed not only notable increased  
191 ribosome occupancy in the early region but also characteristic 3-nt periodicity, indicating that the  
192 ribosomes were not randomly distributed but followed codon-by-codon movement. ACE-tRNAs for  
193 UGA-Trp, UGA-Gly and UAG-Glu, or G418, consistently showed no observable change of ribosome  
194 occupancy even in the early region of 3'UTR. Taken together, the ribosome profiling data argue that  
195 efficiency of native stop codon suppression by ACE-tRNAs is generally low, and markedly less than  
196 the level of PTC suppression.

197  
198 We next examined the *in vivo* activity and stability of ACE-tRNA. We delivered the NLuc-UGA PTC  
199 reporter cDNA together with a plasmid encoding four copies of the ACE-tRNA<sup>Arg</sup> UGA or an 'empty  
200 vector control' into mouse skeletal muscle (tibialis anterior) using electroporation<sup>40-42</sup>. We then  
201 compared these data to the expression of the WT NLuc. The data showed that the ACE-tRNA<sup>Arg</sup>  
202 UGA is a potent *in vivo* PTC suppressor, yielding expression profiles equal to or at some time points,  
203 greater than, the full-length WT NLuc, Figure 5a. The signal from the NLuc-UGA plasmid and non-  
204 electroporated muscle was undetectable. Further, ACE-tRNA<sup>Arg</sup> suppression activity was stable, as  
205 evidenced by the similar duration of NLuc activity between rescued and WT protein, Figure 5b.  
206 Furthermore, this duration and intensity of luciferase expression argues in favor of a high *in vivo*  
207 tolerability and negligible repercussion of increased readthrough observed with ACE-tRNA<sup>Arg</sup>. We  
208 next wanted to determine if functional ACE-tRNAs can be delivered as RNA. To this end, we



209 transfected ACE-tRNA<sup>Trp</sup> and ACE-tRNA<sup>Gly</sup> RNA transcripts into HEK293 cells that stably express  
210 the NLuc-UGA reporter. Here the results indicated that both ACE-tRNAs functioned similarly as  
211 when expressed as cDNA plasmids, with comparable fold rescue when delivered as small RNA  
212 (Figure 5c). Next, we sought to rescue two disease causing mutations in cystic fibrosis  
213 transmembrane conductance regulator (*CFTR*). This large membrane protein controls anion  
214 transport across epithelia in multiple organs and missense and nonsense mutations within its  
215 reading frame cause cystic fibrosis. To this end, *CFTR* p.G542X (c.16524G>T; UGA stop codon)  
216 and p.W1282X (c.3846G>A; UGA stop codon) cDNA were transiently co-expressed with their  
217 respective ACE-tRNA expression plasmids in HEK293 cells and analyzed by Western blot using a  
218 C-terminal antibody to identify production of the full-length protein, Figure 5d. Both rescue  
219 conditions, as well as WT *CFTR* expression, resulted in successfully trafficked *CFTR* protein as  
220 evidence by the presence of both the fully glycosylated band C form and the core glycosylated band  
221 B *CFTR* protein. No signal was seen for either p.G542X or p.W1282X transfected alone, indicating  
222 a low rate of spontaneous read-through of the indicated PTC under these conditions. To better  
223 quantify the PTC suppression properties of each ACE-tRNA in the absence of delivery or expression  
224 caveats, we turned to the *Xenopus laevis* oocyte, a non-dividing model cell in which the ACE-tRNA  
225 concentration (as RNA) can be controlled and functional expression can be quantitated. Specifically,  
226 this expression system is amenable to microinjection and two-electrode voltage-clamp (TEVC)  
227 analysis, a facile electrophysiological method for assessing ion channel function at the plasma  
228 membrane. *CFTR* cRNA (complementary RNA produced *in vitro* from a cDNA template) was  
229 injected alone or together with the indicated ACE-tRNA RNA at increasing concentrations (Figure 5e  
230 & f). Functional *CFTR* channels were not seen for either mutant in lacking co-injected ACE-tRNA,  
231 even in the presence of a maximal *CFTR* activation cocktail, forskolin (10 $\mu$ M; adenylate cyclase  
232 activator) and 3-isobutyl-1-methylxanthine (1mM; phosphodiesterase inhibitor), Figure 5e, left).  
233 However, under the same conditions, when co-injected with 200ng of ACE-tRNA Gly chr19.trna2  
234 (Figure 5e, top right) or Trp chr17.trna39 (Figure 5e, bottom right) *CFTR* chloride conductance was  
235 measured in response to transient changes in membrane potential, indicating that both ACE-tRNAs  
236 were highly efficacious at suppressing two disease-causing UGA PTCs. To better quantify the  
237 relative expression of rescued channels, we compared this rescue to WT *CFTR* cRNA alone (25ng),  
238 and assessed suppression of PTCs in *CFTR* across a range of ACE-tRNA concentrations. The  
239 resulting ACE-tRNA dose response 'current-voltage' relationships are shown in Figure 5f. These  
240 data were generated by plotting the steady state ionic current at each voltage versus the voltage  
241 used to elicit the measured currents and are a direct measure of channel function and abundance.  
242 WT-like current levels of expression were achieved by Gly chr19.trna2, and ~50% for Trp  
243 chr17.trna39 ACE-tRNAs, consistent with the predetermined suppression activity and cognate amino  
244 acid encoding for these tRNA. When rescued *CFTR* currents were normalized to WT currents at

245 35mV, it can be observed that ACE-tRNA<sup>Gly</sup> (black circles) PTC suppression saturates at 100ng  
246 while ACE-tRNA<sup>Trp</sup> (white squares) does not (Figure 5f). Through this analysis, we can estimate that  
247 ACE-tRNA<sup>Trp</sup> RNA transcripts ( $EC_{50} \cong 3.9\mu\text{M}$ ) are less efficacious than ACE-tRNA<sup>Gly</sup> ( $EC_{50} \cong 838\text{nM}$ )  
248 at suppressing their respective CFTR nonsense mutations.

249

250

## 251 **DISCUSSION**

252 PTCs cause a multitude of human diseases and there are no established therapeutic options for  
253 their therapeutic management. Herein, we report the high-throughput cloning and identification,  
254 characterization and functional analysis of anticodon-edited tRNA which display efficacious PTC  
255 reversion in eukaryotic cells and mouse skeletal muscle. Notably, our screen identifies ACE-tRNA,  
256 in total, with the potential to repair a vast majority of known human disease-causing PTC, but this  
257 therapeutic will require overcoming tissue and delivery specific challenges. However, the  
258 engineered tRNA, once delivered, faithfully encode their cognate amino acid, thus abrogating  
259 spurious effects on downstream protein stability, folding, and trafficking, and consequently negating  
260 the need for tandem therapies involving protein folding or trafficking agents. When transfected as  
261 cDNA, ACE-tRNAs rescued multiple full-length proteins via PTC suppression; a NLuc luciferase  
262 reporter, a model protein HDH, and two disease nonsense mutations in *CFTR*. Potent and stable *in*  
263 *vivo* PTC suppression in mouse skeletal muscle was displayed by an ACE-tRNA<sup>Arg</sup> cDNA,  
264 suggesting a particularly high level of cellular tolerance for ACE-tRNA activity. The identification of  
265 an active ACE-tRNA for arginine in muscle is relevant for the treatment of dystrophinopathies  
266 caused by nonsense mutations. Following suit with most genetic diseases, greater than 10 percent  
267 of dystrophinopathies are caused by nonsense mutations<sup>43</sup>, where CGA->TGA mutations are most  
268 prevalent<sup>43</sup>. Efficient suppression was also achieved with ACE-tRNAs delivered as synthetic RNA  
269 transcripts, thus enabling the development of nanoparticle formulations. Future studies will be  
270 needed to assess ideal tRNA delivery strategies for each tissue and disease type, where efforts will  
271 likely benefit from rapidly expanding technologies for nucleic acid delivery.

272

273 Agents which suppress PTCs have the potential to also produce readthrough of native stop codons.  
274 The RNA profiling data presented herein suggest this is, generally, not the case in the cells and for  
275 the codon-edited tRNA that we have tested. While detectable readthrough was found with Arg-  
276 tRNA<sup>UGA</sup> and Gln-tRNA<sup>UAA</sup>, no significant effect on global translation termination was measured with  
277 Glu-tRNA<sup>UAG</sup>, UGA-Gly-tRNA<sup>UGA</sup> and Trp-tRNA<sup>UGA</sup>. This behavior did not obviously segregate with  
278 stop codon type, or the intrinsic PTC suppression activity of the tRNA. One potential reason that  
279 ACE-tRNA ineffectually promote readthrough at real stop codons may be due to the contextual



280 sequence landscapes near translation terminations<sup>44</sup>. This possibility is supported by the finding  
281 that the composition of termination complexes at PTCs differ from those at native stops<sup>45, 46</sup>.  
282 However, in cases where lower level readthrough occurs, there are multiple cellular mechanisms in  
283 place to limit both normal stop read-through and damaging effects thereof. Multiple in-frame stop  
284 codons are frequently found at the end of genes<sup>37-39</sup> and specialized ubiquitin ligases<sup>47</sup> and  
285 ribosome associated pathways<sup>48</sup> are known to identify and degrade proteins with erroneous  
286 translation termination. Nonetheless, despite the limited impact seen here in mammalian cells,  
287 similar ribosomal profiling experiments should be performed in the desired cell or tissue type for  
288 ACE-tRNA delivery and expression.

289  
290 Previous studies have shown that the surrounding mRNA sequence influences inherent stop codon  
291 suppression efficacy of aminoglycosides and Ataluren PTC<sup>49-52</sup>, and ACE-tRNA may be similarly  
292 affected. Further, while gene addition strategies to replace a PTC containing gene, via viral or non-  
293 viral delivery, have achieved short term benefit in some settings, it may be difficult to regulate  
294 transgene expression levels. In contrast, the abundance of protein rescue via ACE-tRNA  
295 suppression is coupled to native cellular RNA levels, and thus upper levels of expression will be  
296 intrinsically regulated. The biological purpose remains unknown for a majority of the variable  
297 isoacceptor tRNA sequences in the human genome, and almost half these genes have been  
298 speculated to be transcriptionally silent pseudogenes<sup>53</sup>, however the data here suggest many  
299 annotated tRNA are viable. Consistent with this possibility, a suppression approach has been used  
300 to identify functional isodecoder tRNAs within Ser and Leu isoacceptor families<sup>54</sup>. The data we  
301 present here further demonstrate that the majority of tRNA gene sequences support viable activity  
302 when removed from the genomic context, further deepening the mystery for the biological need for a  
303 plurality of tRNA, and codon usage. Thus, the high-throughput suppression strategy described here  
304 will be useful to identify new types of tRNA sequences with unique suppression properties, and such  
305 studies have the potential to produce new RNA reagents as well as advance the molecular  
306 understanding tRNA expression and suppression.

307 **Figures**

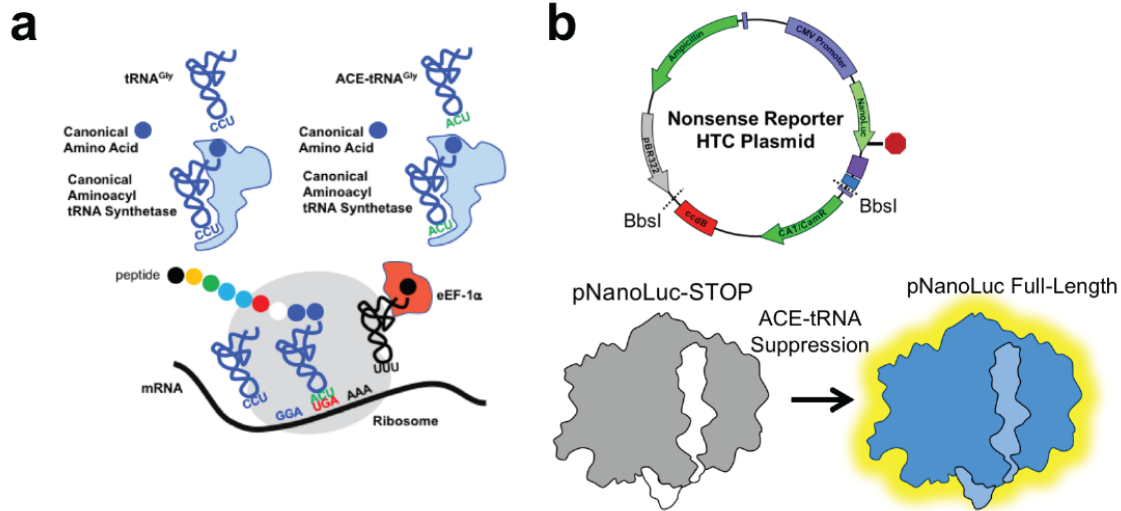

324

325 **Figure 1** A nonsense mutation suppression screen to identify candidate anticodon edited tRNAs  
326 (ACE-tRNAs). **a**, Schematic illustrates requisite interactions of ACE-tRNAs with translational  
327 machinery. Following delivery, ACE-tRNAs are recognized by an endogenous aminoacyl-tRNA  
328 synthetase (blue shape) and charged (aminoacylated) with their cognate amino acid (blue circle).  
329 The aminoacylated ACE-tRNA is recognized by the endogenous elongation factor 1-alpha (red  
330 shape), which protects the ACE-tRNA from being de-acylated and delivers the aminoacyl ACE-tRNA  
331 to the ribosome (light grey shape) for suppression of a premature termination codon, in this instance  
332 UGA. **b**, Individual ACE-tRNAs were cloned into the High Throughput Cloning Nonsense Reporter  
333 plasmid using Golden Gate paired with CcdB negative selection. The all-in-one plasmid contains the  
334 NLuc luciferase reporter with either a UGA, UAG or UAA PTC at p.162 between the enzymatic large  
335 bit and requisite C-terminal small bit.

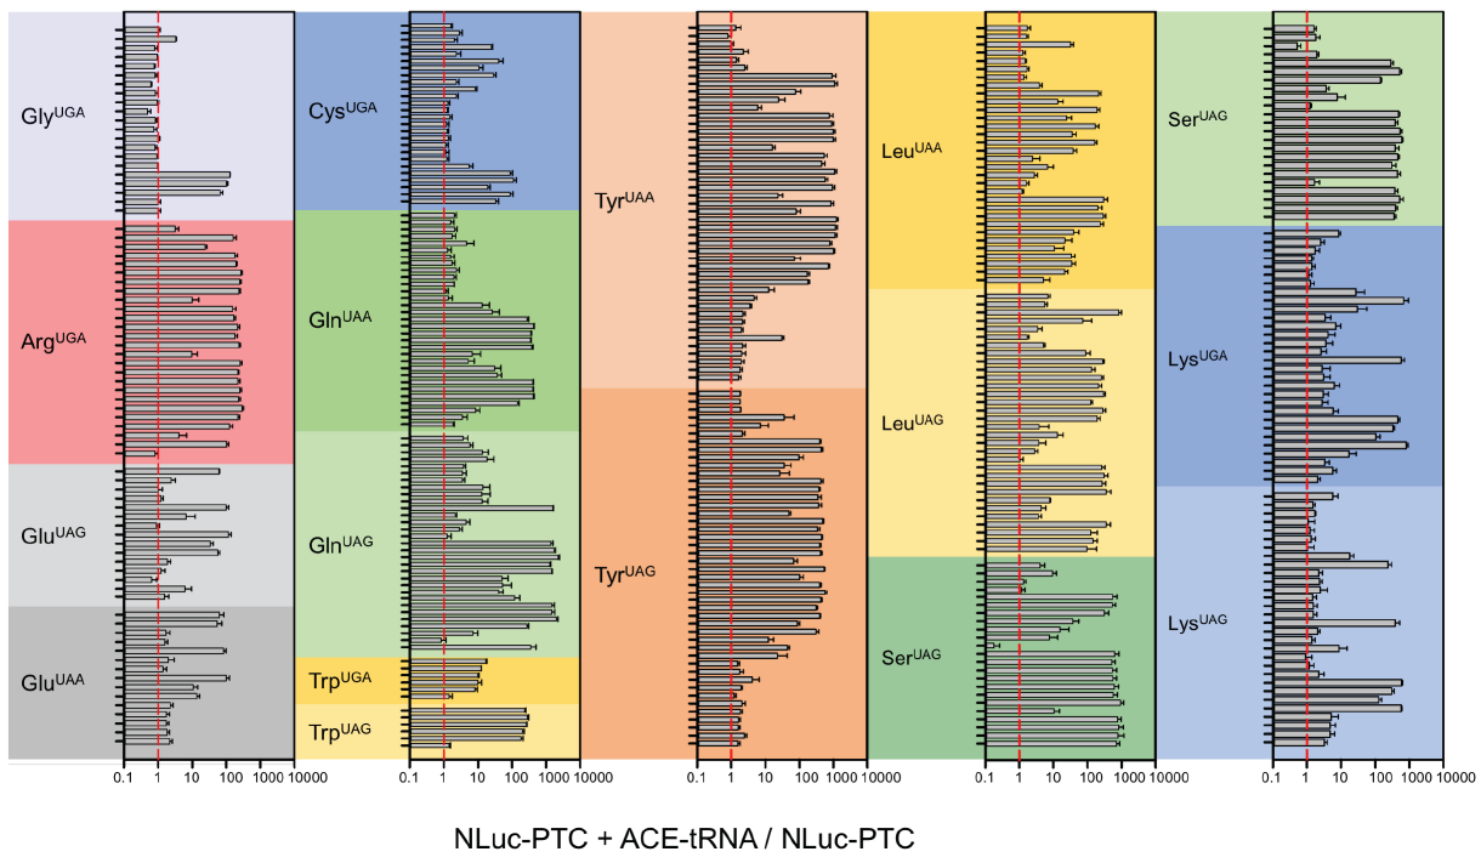

336 **Figure 2** Screens of ACE-tRNA gene families with the high throughput cloning nonsense mutation  
337 reporter platform. The indicated anticodon edited PTC sequences were tested for each ACE-tRNA  
338 family that is one nucleotide away from the endogenous anticodon sequence, Supplemental Figure  
339 1. Multiple high performing suppressor tRNA were identified for each class. Data are shown in  
340 Log10 scale in terms of normalized NLuc luminescence. Each tRNA dataset were obtained in  
341 triplicates and are displayed at SEM, with the corresponding ANOVA statistical analysis in Table 2.  
342 Coded identities and corresponding tRNA sequences are shown in Supplemental Figure 2 and Table  
343 1, respectively.

344

345

346

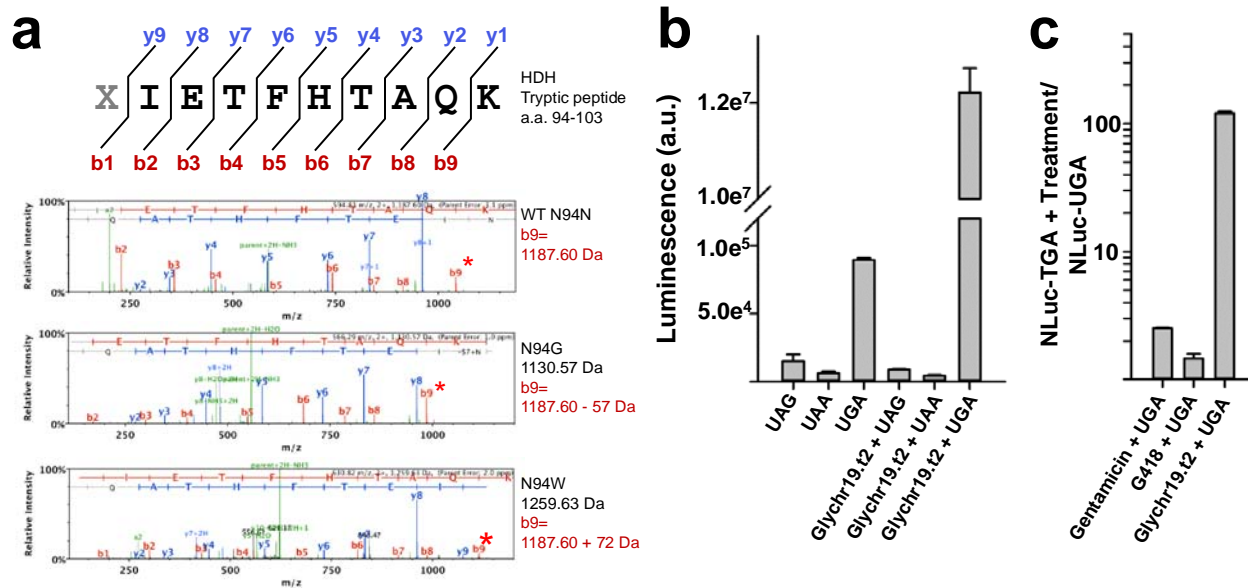

347

348

349 **Figure 3** Cognate Encoding and High-Fidelity Suppression by Engineered tRNA. **a**, Tryptic  
 350 fragment of histidinol dehydrogenase (HDH), where “X” indicates suppressed PTC codon. MS/MS  
 351 spectra of the tryptic fragment with masses of indicated *y* and *b* ions for WT (top), N94G (middle)  
 352 and N94W (bottom) HDH. *b*<sub>9</sub> ion mass is shifted by the predicted mass of -57 Da and +72 Da from  
 353 the WT asparagine, indicating the encoding of cognate amino acids glycine and tryptophan by ACE-  
 354 tRNA<sup>Gly</sup> and ACE-tRNA<sup>Trp</sup>, respectively. **b**, ACE-TGA - tRNA<sup>Gly</sup> (Glychr19.t2) selectively suppresses  
 355 the UGA stop codon in transiently transfected HEK293 cells. **c**) ACE-tRNA<sup>Gly</sup> transfection  
 356 outperforms both gentamicin (40uM) and G418 (140uM) following a 48hr incubation in Hek293 cells  
 357 stably expressing NLuc-UGA.

358

359

360

361

362



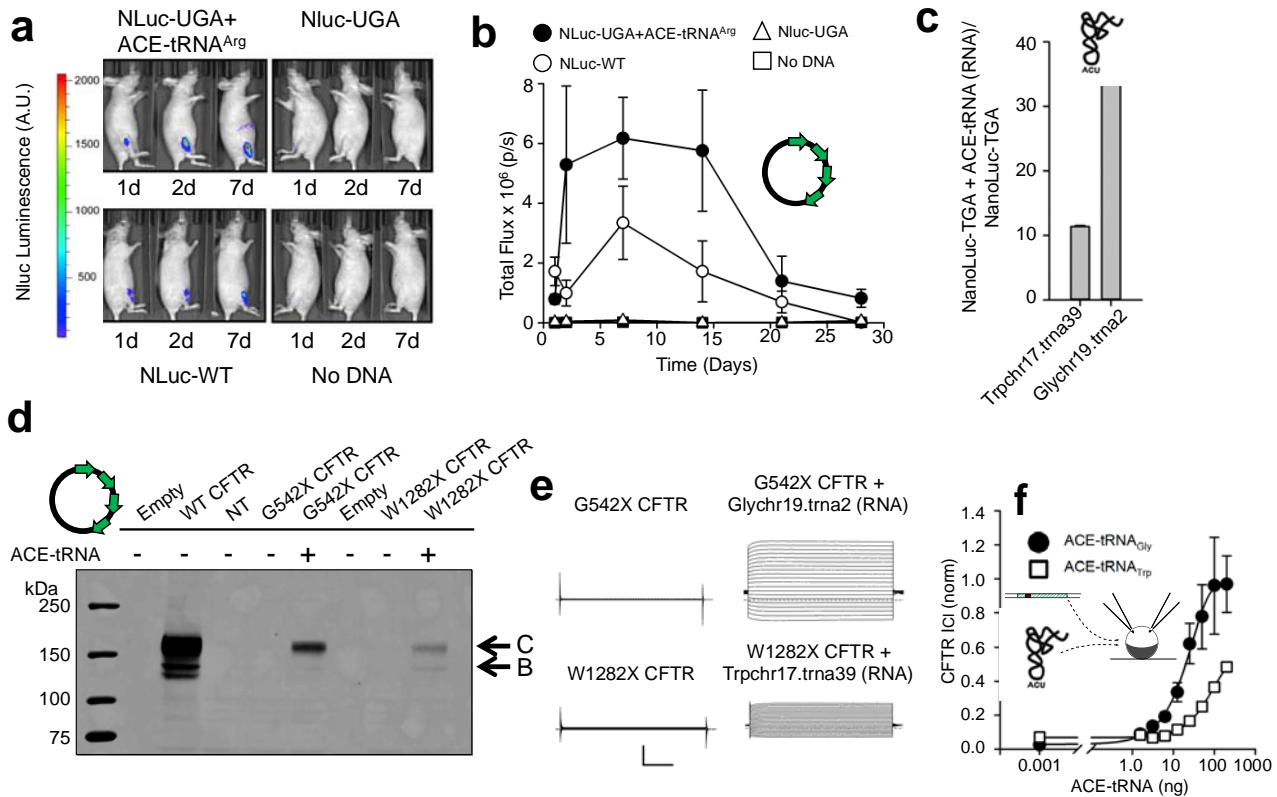

374 **Figure 5.** *In vivo* delivery and suppression with ACE-tRNA as cDNA and RNA. **a**, Representative  
 375 images of mice injected with NLuc-UGA with ACE-tRNA<sup>Arg</sup> or pUC57 empty vector, NLuc-WT or  
 376 water in the tibialis anterior muscle followed by electroporation at days 1,2 and 7 after DNA  
 377 administration. **b**, Quantification of luminescence emission by the tibialis anterior muscles of the  
 378 abovementioned mouse groups at different timepoints after DNA injection and electroporation  
 379 (n=3 mice per group). **c**, Rescued luminescence of stably expressed NLuc-UGA following transfection  
 380 of Trpchr17.trna39cRNA and Glychr19.trna2 RNA transcripts (n=4). **d**, Representative western blot  
 381 analysis of CFTR protein expressed in HEK293 cells 36 hours following transfection of WT, G542X,  
 382 G542X + Glychr19.trna2, W1282X and W1282X + Trpchr17.trna39 CFTR cDNA. **e**, Exemplar  
 383 families of CFTR Cl<sup>-</sup> current traces recorded using two-electrode voltage-clamp, 36 hours following  
 384 injection with WT, G542X, G542X + ACE-tRNA-Glychr19.trna2, W1282X and W1282X + ACE-tRNA-  
 385 Trpchr17.trna39 CFTR cRNA. Currents were elicited using 5mV voltage steps from -60 to +35mV.  
 386 The vertical and horizontal scale bars indicate 10uA and 50ms, respectively. **f**, Dose response of  
 387 G542X ACE-tRNA<sup>Gly</sup> (filled circles) and W1282X ACE-tRNA<sup>Trp</sup> (open squares) rescue (CFTR Cl<sup>-</sup>  
 388 currents elicited at +35mV were normalized to WT CFTR Cl<sup>-</sup> currents at +35mV). ACE-tRNA<sup>Gly</sup>  
 389 rescue achieves WT-level of expressed CFTR current.  
 390



## 391 **ACKNOWLEDGEMENTS**

392 This work and JDL were supported by Emily's Entourage ([www.emilysentourage.org](http://www.emilysentourage.org)). Additional  
393 support was provided by a Cystic Fibrosis Foundation (CFF) Pilot Award (R458-CR11) and  
394 Research Grant (498721), the NIH (GM106568) and CAA is an American Heart Association  
395 Established investigator (5EIA22180002). JS-Y and WRS are supported directly through the CFF  
396 and Cystic Fibrosis Foundation Therapeutics (CFFT) Research laboratory. DTI is supported by the  
397 Cystic Fibrosis Foundation (INFIEL17F0). D.B.W. is funded by the WW Smith Family Trust. PBM is  
398 supported by the Roy J. Carver Charitable Trust. The authors acknowledge formative discussions  
399 with J. Kevin Foskett (University of Pennsylvania) that facilitated development of this study. We  
400 thank Dr. Julien Sebag (University of Iowa, Department of Molecular Physiology and Biophysics) for  
401 providing access to Spectramax i3.

402 Approved by Institutional Animal Care and Use Committee at the Wistar Institute (protocol  
403 number: 112762).

## 404 **DATA AVAILABILITY STATEMENT**

- 405 • The datasets generated during and/or analysed during the current study are available from the  
406 corresponding author on reasonable request.
- 407 • All data generated or analysed during this study are included in this published article (and its  
408 supplementary information files).

## 409 **MATERIALS AND METHODS**

410

### 411 **Nonsense reporter HTC plasmid**

412 The parent plasmid used was pcDNA3.1(+). The cDNA encoding pNLuc was Gibson  
413 Assembled (New England Biolabs, USA) into restriction sites HindIII and XhoI. A glycine (codon  
414 gga), tryptophan (tgc), amber (tag), opal (tga) and ochre (taa), were added to amino acid  
415 position 160 during cDNA pcr. The pcDNA3.1(+) polyA sequence was replaced for one with no  
416 BbsI restriction sites using pcr based Gibson Assembly. The high throughput ACE-tRNA  
417 Golden Gate cloning site was generated by first inserting the 5' leader sequence of the human  
418 tRNA<sup>Tyr</sup> gene (bold) with a T7 promoter sequence upstream (italics) (*TAATACGACTCACTATAG*  
419 **AGCGCTCCGGTTTTTCTGTGCTGAACCTCAGGGGACGCCGACACACGTACACGTC**) (Ye et  
420 al., 2008) followed by two BbsI restriction sites (underlined) (TAGTCTTCGG (*ccdB cassette*)  
421 AAGAAGACCG) and 3' termination sequence (bold) followed by a reverse T3 primer sequence  
422 (italics) (**GTCCTTTTTTGC***TTTAGTGAGGGTTAATT*).

423

### 424 **HTC of ACE-tRNA library**

425 tRNA gene sequences were obtained from the tRNA database tRNAscan-SE  
426 (<http://gtrnadb.ucsc.edu/index.html>; PMID: 26673694). Sequences of all tRNA genes used in

427 this study are numbered in Supplemental Figure 2 and table 1). tRNA sequences were  
428 synthesized as complementary Ultramers from Integrated DNA Technologies (IDT, USA) in 96  
429 well format at 200pmol scale with their corresponding anticodons mutated appropriately (UAG,  
430 UGA or UAA). All tRNA sequences were synthesized with CGAC and GGAC overhangs  
431 (annotated 5'->3') on forward and reverse oligos, respectively. Ultramers were annealed by  
432 resuspending in annealing buffer (100 mM Potassium Acetate; 30 mM HEPES, pH 7.5) to  
433 100ng/ul, heated to 96°C for 2 mins and cooled at 1°C/min in a thermocycler to 4°C. In 96 well  
434 PCR plates, each well contained 10ng of HTC plasmid with appropriate PTC codon, 2ng ACE-  
435 tRNA duplex, 1mM ATP, 10mM DTT, 400 Units T4 DNA Ligase, and 10 Units BbsI-HF, queued  
436 to 10ul with ddH<sub>2</sub>O. The 96 well plates were cycled as follows ([5 min @37°C, 5 min @20°C] x  
437 30 cycles, 10 min @ 37°C, 10 min @ 80°C and cooled to 4°C in a thermocycler. In a deep  
438 well 96 well plate 1ul of the Golden Gate reaction was added to 10ul of DH5α chemically  
439 competent cells (ThermoFisher, USA), heat-shocked @ 42°C for 30 sec and resuspended in  
440 100ul of Super Optimal Broth (S.O.C.; ThermoFisher, USA). Transformations were outgrown at  
441 37°C for 1hr, 250 rpm and then added to 2ml of Luria-Bertani liquid media (LB) supplemented  
442 with 100ug/ml Carbenicillin and grown in covered deep 48 well plates @ 37°C for 20hrs, 300  
443 rpm. E. coli outgrowth was performed in deep well plates and clamps from EnzyScreen  
444 (<http://www.enzyScreen.com>). E. coli suspension cultures were spun down (10min, 4,000g at  
445 RT) and plasmid DNA was prepared and diluted to 125ng/ul (IBI scientific, USA). All clones  
446 were sequence verified. Using this method, we achieved 100% cloning efficiency.

447

#### 448 **HTS of ACE-tRNA library**

449 The day before transfection, HEK293 cells (<40 passages) were plated at  $1.4 \times 10^4$  cells/well in  
450 96 well cell culture treated plates in Dulbecco's Modified Essential Medium (DMEM)  
451 supplemented with 10% FBS, 1% Pen/Step and 2mM L-Glutamine (ThermoFisher, USA). The  
452 all-in-one nonsense reporter with ACE-tRNA genes were transfected in triplicate/plate using  
453 Calfectin (Signagen, USA). 16hrs post-transfection, the media was aspirated and 20ul of PBS  
454 was added to each well. 15ul of lytic Nano-Glo® Luciferase Assay Reagent was added to each  
455 well (1:50 reagent to buffer; Promega, USA). The plates were incubated for 2min after  
456 rotational shaking and read using a SpectraMax i3 plate reader (Molecular Devices, USA;  
457 integration time, 200ms; All wavelengths collected in endpoint mode). Luminescence was  
458 averaged across three wells for each experiment and all ACE-tRNAs were repeated >3 times in  
459 this fashion. Each plate also contained in triplicate wells transfected with the all-in-one  
460 nonsense reporter with no ACE-tRNA to serve as control for transfection efficiency and  
461 baseline PTC readthrough. All values are reported as ratios of ACE-tRNA luminescence over  
462 baseline PTC readthrough luminescence  $\pm$  SEM. One-way ANOVAs were performed with  
463 Tukey's post-hoc analysis across all ACE-tRNAs in a given amino acid family, Supplemental  
464 Table 2.

465

#### 466 **CFTR, HDH-his-strep and 4xACE-tRNA expression plasmids**

467 For expression in mammalian cells, the cDNA for the coding region and 200 base-pair of the 3'  
468 untranslated region (UTR) of human CFTR was ligated into pcDNA3.1(+) (Promega, USA) using  
469 the KpnI and XbaI restriction enzymes. The G542tga and W1282tga mutations were introduced  
470 using QuickChange XL II (Stratagene, USA). For expression in *Xenopus laevis* oocytes, the

471 cDNA for the coding region and 140 base-pair of the 5' and 244 base-pair 3' UTR of human  
472 CFTR was ligated into pGEM-HE (Promega, USA). Both the G542tga and W1282tga  
473 mutations were introduced using QuickChange XL II. The cDNA encoding the E. coli histidinol  
474 dehydrogenase was codon optimized for *mus musculus* and synthesized (BioBasic Inc,  
475 Canada) with a c-terminal 8xHis-Strep- tag for protein purification from mammalian cells  
476 (supplemental figure X). The synthesized cDNA was ligated into pcDNA3.1(+) using EcoRI and  
477 XhoI restriction sites. The nonsense mutations tag, taa and tga were introduced using  
478 QuickChange XL II. To generate multiplexed ACE-tRNA expression plasmids, we generated a  
479 novel parent Golden Gate pUC57(amp) plasmid by inserting a BbsI "multiple cloning site" (5'-  
480 GAATTCTTCCCGAGACG**TTCCAAGTCTTCATGAAGACTACAGGCGTCTCCAGGAAGCT**-3';  
481 directional BbsI recognition sequences are underlined and unique four base-pair overhangs for  
482 ligation are bolded) between the EcoRI and HindIII restriction sites. pUC57(amp) was chosen  
483 as a parent plasmid because it is relatively small in size and lacks backbone BbsI restriction  
484 sites and T7 and T3 promoter sequence. A feature included in the HTS plasmid is T7 and T3  
485 promoter sequence flanking the ACE-tRNA cassette, giving universal primer binding sequences  
486 with comparable melting temperatures ( $T_m$ ), ideal for PCR amplification. Using the NEB Golden  
487 Gate Assembly Tool (<https://goldengate.neb.com/editor>) we generated PCR primers that  
488 annealed to the T7 and T3 flanking sequence and created unique four base-pair overhangs  
489 following cleavage of distal BbsI recognition sequence. The end result was the generation of  
490 four ACE-tRNA PCR products using universal PCR primers that could be "daisy-chained" through  
491 complementary four base-pair overhangs and ligated into the puc57 Golden Gate plasmid using  
492 a one-pot Golden Gate reaction. All clones were sequence verified.

493  
494

#### 495 **Cell culture, protein expression and Western blot**

496 HEK293T cells (ATCC, USA) were grown in standard growth media containing (% in v/v) 10%  
497 FBS (HiClone, USA), 1% Pen Strep, 1% L-Glut in high glucose DMEM (Gibco, USA) at 37°C,  
498 5% CO<sub>2</sub>. cDNA was transfected at 75% confluency using Calfectin according to standard  
499 protocols (SignaGen Laboratories, USA). Following 36hrs the cells were scraped and pelleted  
500 at 7,000g for 8 min at 4°C in PBS supplemented with 0.5 µg/ml pepstatin, 2.5 µg/ml aprotinin,  
501 2.5 µg/ml leupeptin, 0.1 mM PMSF, 0.75 mM benzamidine. For CFTR expressing cells, the cell  
502 pellet was vigorously dounced in 100mM sucrose, 150 mM NaCl, 1mM DTT, 0.5 µg/ml  
503 pepstatin, 2.5 µg/ml aprotinin, 2.5 µg/ml leupeptin, 0.1 mM PMSF, 0.75 mM benzamidine, 50  
504 mM Tris-HCl pH 7.4 and centrifuged at 100,000g to separate total membranes from the soluble  
505 cytosolic proteins. Pellets were solubilized in a buffer containing 1% Triton, 250mM NaCl, 50mM  
506 Tris-HCl pH 7.4, and 0.5 µg/ml pepstatin, 2.5 µg/ml aprotinin, 2.5 µg/ml leupeptin, 0.1 mM  
507 PMSF, 0.75 mM benzamidine. Equal cell-lysate was loaded on a 3-15% separating gradient  
508 SDS-page with 4% stacking gel in the presence of 1% 2-mercaptoethanol, separated at 55 V  
509 O/N and transferred to 0.45 µM LF PVDF (Bio-Rad, USA). PVDF was immunoblotted using anti-  
510 CFTR antibody M3A7(1:1000; Millipore, USA) in 2% non-fat milk and imaged on LI-COR  
511 Odyssey Imaging System (LI-COR, USA). For HDH-His-Strep expressing cells, the cell pellet  
512 was vigorously dounce homogenized in 100mM sucrose, 1mM DTT, 1mM EDTA, 20mM Tris-HCl  
513 pH 8.0, 0.5 µg/ml pepstatin, 2.5 µg/ml aprotinin, 2.5 µg/ml leupeptin, 0.1 mM PMSF and 0.75  
514 mM benzamidine. The lysate was centrifuged at 100,000g for 30min at 4 °C. The supernatant

515 (soluble cellular protein) was separated on 4-12% Bis-Tris SDS-page acrylamide gels  
516 (ThermoFisher, USA) in the presence of 1% 2-mercaptoethanol, transferred to 0.22  $\mu$ M LF  
517 PVDF (Bio-Rad, USA) and immunoblotted using anti-Strep antibody (1:5000; iba, Germany) in  
518 2% non-fat milk and imaged on LI-COR Odyssey Imaging System (LI-COR, USA).

519

## 520 **Mass spectrometry**

521 Fragmentation data on purified HDH-His-Strep protein were obtained at the University of Iowa  
522 Proteomics Facility. Briefly, HDH-His-Strep protein from the soluble fraction of the high-speed  
523 spin was passed through StrepTrap HP columns (GE Healthcare, Sweden) and washed with 5  
524 column volumes of 100mM sucrose, 1mM DTT, 1mM EDTA, 20mM tris-HCl pH 8.0, 0.5  $\mu$ g/ml  
525 pepstatin, 2.5  $\mu$ g/ml aprotinin, 2.5  $\mu$ g/ml leupeptin, 0.1 mM PMSF and 0.75 mM benzamidine.  
526 The protein was eluted in wash buffer supplemented with 10mM d-desthbiotin and concentrated  
527 in 30kDA cutoff Amicon-Ultra filtration columns (Millipore, USA). The concentrated protein was  
528 loaded on NuPage 4-12% Bis-Tris precast gels (Invitrogen, USA) and separated at 150V for 1.5  
529 hrs. The gel was stained using a Pierce mass spec compatible silver stain kit (ThermoFisher  
530 Scientific, USA).

531

532 **In-gel Trypsin Digestion.** Briefly, the targeted protein bands from SDS-PAGE gel were  
533 manually excised, cut into 1 mm<sup>3</sup> pieces, and washed in 100 mM ammonium  
534 bicarbonate:acetonitrile (1:1, v/v) and 25 mM ammonium bicarbonate /acetonitrile (1:1, v/v),  
535 respectively to achieve complete destaining. The gel pieces were further treated with ACN, and  
536 dried *via* speed vac. After drying, gel pieces were reduced in 50  $\mu$ l of 10 mM DTT at 56 °C for  
537 60 min and then alkylated by 55 mM IAM for 30 min at room temperature. The gel pieces were  
538 washed with 25 mM ammonium bicarbonate:acetonitrile (1:1, v/v) twice to removed excess DTT  
539 and IAM. After drying, the gel pieces were placed on ice in 50  $\mu$ L of trypsin solution at 10 ng/ $\mu$ L  
540 in 25 mM ammonium bicarbonate and incubated on ice for 60 min. Then, digestion was  
541 performed at 37 °C for 16 h. Peptide extraction was performed twice for 0.5 h with 100  $\mu$ l 50%  
542 acetonitrile/0.2% formic acid. The combined extracts were concentrated in a Speed Vac to ~15  
543  $\mu$ l.

544

545 **LC-MS/MS.** Our mass spectrometry data were collected using an Orbitrap Fusion Lumos mass  
546 spectrometer (Thermo Fisher Scientific, San Jose, CA) coupled to an Eksigent Ekspert™  
547 nanoLC 425 System (Sciex). A Trap-Elute Jumper Chip (P/N:800-00389) and a coupled to a  
548 1/16" 10 port Valco directed loading performed by the gradient 1 pump and final elution (by the  
549 gradient 2 pump). The column assembly was designed as two tandem 75  $\mu$ m x 15cm  
550 columns (ChromXP C18-CL, 3 $\mu$ m 120A, Eksigent part of AB SCIEX) mounted in the ekspert™  
551 cHiPLC system. For each injection, we loaded an estimated 0.5  $\mu$ g of total digest. Peptides  
552 were separated in-line with the mass spectrometer using a 120 min gradient composed of linear  
553 and static segments wherein Buffer A is 0.1% formic acid and B is 95%ACN, 0.1% Formic  
554 acid. The gradient begins first holds at 4% for 3 min then makes the following transitions (%B,  
555 min): (26, 48), (35, 58), (35, 64), (50, 72), (50, 78), (94, 84), (94, 96), (4, 100), (4, 120).

556 **Tandem mass spectrometry on the LUMOS Orbitrap.** Scan sequences began with a full  
557 survey (m/z 350 -1500) acquired on an Orbitrap Fusion Lumos mass spectrometer (Thermo) at  
558 a resolution of 60,000 in the off axis Orbitrap segment (MS1). Every 3 seconds of the gradient  
559 MS1 scans were acquired during the 120 min gradient described above. The most abundant  
560 precursors were selected among 2-8 charge state ions at a 2.0E5 threshold. Ions were

561 dynamically excluded for 30 seconds if they were targeted twice in the prior 30 sec. Selected  
562 ions were isolated by a multi-segment quadrupole with a mass window on  $m/z$  2, then  
563 sequentially subjected to both CID and HCD activation conditions in the IT and the ion routing  
564 multipole respectively. The AGC target for CID was  $4.0E04$ , 35% collision energy, an activation  
565  $Q$  of 0.25 and a 100 milliseconds maximum fill time. Targeted precursors were also fragmented  
566 by high energy collision-induced dissociation (HCD) at 40% collision energy, and an activation  
567  $Q$  of 0.25. HCD fragment ions were analyzed using the Orbitrap (AGC  $1.2E05$ , maximum  
568 injection time 110 ms, and resolution set to 30,000 at 400 Th). Both MS2 channels were  
569 recorded as centroid and the MS1 survey scans were recorded in profile mode.

570

571 **Proteomic Searches.** Initial spectral searches were performed with Proteome Discoverer  
572 version 2.1.1.21 (ThermoFisher Scientific, USA) using Sequest HT. Spectra were also  
573 searched with Byonic search engine (Protein Metrics) ver. 2.8.2. Search databases were  
574 composed of the Uniprot KB for species 9606 (Human) downloaded 10/24/2016 containing  
575 92645 sequences and Uniprot KB for taxonomy 562 (*E. coli*) downloaded on 11/08/2016  
576 containing 10079 sequences. For Byonic searches, these two data bases were directly  
577 concatenated. In either search an equal number of decoy entries were created and searched  
578 simultaneously by reversing the original entries in the Target databases.

579

580 ***In vitro* cRNA transcription.** G542X<sub>UGA</sub>, W1282X<sub>UGA</sub>, and WT CFTR pGEMHE (Mense et al.,  
581 2006; PMID:1703051) plasmids were linearized by 10 x excess of NheI-HF restriction enzyme  
582 (site positioned 3' of coding region)(New England BioLabs, USA) for 3hrs at 37°C and purified  
583 using standard cDNA precipitation methods. All cRNAs were transcribed using the mMessage  
584 mMachiner T7 Kit (ThermoFisher Scientific, USA). Purification of the cRNA from the transcription  
585 reaction was conducted on columns from the RNeasy Mini Kit (Qiagen, Germany).  
586 Concentration was determined by absorbance measurements at 260 nm and quality was  
587 confirmed on a 1% agarose gel (RNase-free). All cRNA was queued to 1 $\mu$ g/ml before use and  
588 all results were generated from  $\geq 2$  cRNA preparations.

589

590 ***In vitro* tRNA transcription.** Trpchr17.trna39 and Glychr19.trna2, the top performing Trp and  
591 Gly ACE-tRNAs, were transcribed in vitro using CellScript T7-Scribe Standard RNA IVT Kit  
592 (CELLSCRIPT, USA). Equimolar concentration of T7 oligo (5'-taatacagactactata-3') was  
593 annealed to ACE-tRNA PAGE-purified Ultramers (20ug; Integrated DNA Technologies,  
594 Coralville, IA) coding for the ACE-tRNA and preceded by a T7 promoter (*italics*). Importantly,  
595 the three terminal nucleotides containing CCA were included (**bold**).

596 Trpchr17.trna39 (3'->5'):

597 **TGGT**GACCCCGACGTGATTTGAACACGCAACCTTCTGATCTGAAGTCAGACGCGCTACCG  
598 TTGCGCCACGAGGCCATAGTGAGTCGTATTA

599 Glychr19.trna2 (3'->5'):

600 **TGGT**GCGTTGGCCGGGAATCGAACCCGGGTCAATGCTTTGAAGGAGCTATGCTAACCATA  
601 TACCACCAACGCTATAGTGAGTCGTATTA



602 The total reaction volume was adjusted to 100  $\mu$ l and the kit reagents were added in the  
603 following amounts: 10  $\mu$ l of 10X T7-Scribe transcription buffer, 7.5  $\mu$ l of each nucleotide (100  
604 mM stocks), 10  $\mu$ l of 100 mM Dithiothreitol, 2.5  $\mu$ l ScriptGuard RNase Inhibitor, 10  $\mu$ l T7-Scribe  
605 enzyme solution. After the reaction was incubated for 4–5 hr at 37°C, the DNA template was  
606 digested with 5  $\mu$ l DNase (1 U/ $\mu$ l) provided with the kit for 30–60 min. The ACE-tRNA was  
607 extracted from the reaction with acidic phenol chloroform (5:1, pH 4.5) and precipitated with  
608 ethanol. The precipitates ACE-tRNA was pelleted, washed, dried and resuspended in 100  $\mu$ l  
609 DEPC-treated water and further purified with Chroma Spin-30 columns (Clontech, USA). The  
610 procedure yielded roughly 100  $\mu$ l of ~5  $\mu$ g/ $\mu$ l ACE-tRNA. ACE-tRNAs were re-pelleted in 20  $\mu$ g  
611 aliquots, washed, lyophilized and stored at -80°C until use. All results were generated from  $\geq$   
612 ACE-tRNA preparations.

613 **Ribosome Footprint Profiling Library preparation.** HEK293 cells transiently transfected with  
614 ACE-tRNAs and control plasmid (puc57GG) were grown in standard grown media in the  
615 absence of Pen-Strep for 48 h. Libraries were prepared as described<sup>55</sup>, with a few modifications.  
616 Briefly, cells were rapidly cooled by addition of ice-cold PBS, lysed in lysis buffer (20 mM Tris-  
617 HCl/pH7.4, 150 mM NaCl, 5 mM MgCl<sub>2</sub>, 1 mM DTT, 1% (v/v) Triton X-100, and 25 U ml<sup>-1</sup> Turbo  
618 DNase I) for 10 min on ice, and triturated with ten times through a 26-G needle. After clearance  
619 by centrifugation at 16,000g for 10 min at 4°C, the lysates were digested with 100 U RNase I  
620 (Ambion, USA) per A<sub>260</sub> lysate at room temperature for 45 min with gentle agitation prior to  
621 adding 200 U RiboLock RNase Inhibitor (Thermo Scientific). Ribosome protected mRNA  
622 fragments were then isolated by loading lysates onto a 1M sucrose cushion prepared in  
623 modified polysome buffer (20 mM Tris-HCl/pH7.4, 150 mM NaCl, 8.5 mM MgCl<sub>2</sub>, 0.5 mM DTT,  
624 20 U ml<sup>-1</sup> RiboLock RNase Inhibitor) and centrifugated at 70,000 rpm at 4°C for 2 h using a  
625 Beckmen TLA-110 rotor. Ribosome pellets containing mRNA footprints were extracted using  
626 TRIzol and separated on a denaturing 12% polyacrylamide gel containing 8M urea. RNA  
627 fragments with sizes ranging from 26 to 34 nt were manually excised from the gel stained with  
628 SYBR Gold (Invitrogen) and isolated to generate the ribosome-protected fragment library.  
629 Contaminating rRNA fragments depleted using a Ribo-Zero kit (Illumina). 3' Oligonucleotide  
630 adaptor ligation, reverse transcription, circularization, and secondary rRNA depletion using  
631 biotinylated rRNA depletion oligos (Table 1) were performed as described<sup>55</sup>. Libraries were  
632 barcoded using indexing primers for each sample during PCR amplification. Barcoded libraries  
633 were then pooled with 3% PhiX (Illumina) and sequenced in an Illumina NextSeq 500 as per  
634 manufacturer protocol to typically generate 18-27 million reads per sample.

635  
636 **Ribosome Footprint Data analysis.** Data files for each barcoded sample (minus adaptor  
637 sequence at 3' end) were first mapped to four rRNA sequences (RNA5S1;NR\_023363, RNA5-  
638 8SN5; NR\_003285, RNA18SN5;NR\_003286, and RNA28SN5;NR\_003287) using HISAT 2.0.3  
639<sup>56</sup> to eliminate rRNA contaminant reads. The remaining reads were aligned to the sense stands  
640 of the longest transcript variant of each human gene (UCSC RefSeq GRCh38). Transcripts with  
641 3'UTR length of at least 75 nt (18,101 sequences) were used for subsequence analysis. A  
642 maximum of two mismatches at the 5' end of reads was allowed. All multi-mapped reads were  
643 discarded. Fragment reads with lengths between 26 to 34 nt were defined as ribosome  
644 footprints and used for analysis. The 5' end nucleotide from each footprint was annotated and  
645 mapped on each transcript. Position of the ribosome A-site occupying the 16th-18th nucleotides



646 of each footprint<sup>57, 58</sup> was used to infer the position of the ribosome on each transcript. RPKM  
647 (footprint Reads Per Kilobase of transcript per total Million-mapped reads) on each individual  
648 transcript (18,101 sequences) was calculated. Only transcripts with a minimum threshold of 5  
649 RPKM in the coding sequence and 0.5 RPKM in 3'UTR region in two replicate libraries (254  
650 transcripts in G418 and 495-748 transcripts in ACE-tRNAs) were included for analysis in Figure  
651 4a. For transcriptome-wide metagene plots in Figure 4b, footprint counts for each nucleotide  
652 within the region from -35 to +65 nt relative to the first nucleotide of stop codon were normalized  
653 per total million-mapped reads. All transcripts (18,101 sequences) were used for mapping, and  
654 more than 5,200 transcripts were mapped to at least 1 footprint in the region of interest. Next,  
655 we examined the in vivo bioactivity of ACE-tRNAs Glychr19.trna2 and Trpchr17.trna39 to  
656 rescue PTC. The sequencing data was analyzed using Galaxy platform<sup>59</sup>. Graphs were  
657 generated using Prism 7 (GraphPad Software)

658 **Generation of stable NLuc reporter cell lines.** The cDNAs encoding pNLuc with tag, taa and  
659 tga stop codons at amino acid position 160 were inserted into AgeI and NotI restriction sites  
660 within the multiple cloning site of the retroviral vector pQCXIP (Clontech, USA) using Gibson  
661 Assembly (New England Biolabs, USA). PhoenixGP cells (PMID: 7690960) were co-transfected  
662 with pNLuc-STOP-pQCXIP and cmv-VSV-G (VSV-G envelope pseudotyping) plasmids using  
663 Calfectin (SignaGen Laboratories, USA) and placed in a 33°C CO<sub>2</sub>-controlled (5%) cell  
664 incubator for 48hr. The culture media (20mls) containing retroviral particles was chilled to 4°C  
665 and spun at 10,000g to remove cell debris and filtered through a 0.45um MCE-membrane  
666 syringe filter (Millipore, USA) onto two 10cm dishes seeded with low-passage HEK293 cells at  
667 30% confluency. Cell culture dishes were sealed with Parafilm and spun for 90 minutes at  
668 3,500g at 24°C and placed in a 37°C CO<sub>2</sub> controlled (5%) cell culture incubator. Cells were  
669 selected 24hr later with puromycin (1ug/ml) until the control dish (no infection) showed complete  
670 cell death. Cells were monodispersed into 96-well plates using FACS and clonal populations  
671 were subsequently. Puromycin was not used to maintain selected clones during  
672 experimentation and standard DMEM media (DMEM–Dulbecco's Modified Eagle Medium-high  
673 glucose with L-glutamine supplemented with 10% FBS, 1% Pen/Step and 2mM L-Glutamine;  
674 ThermoFisher, USA) was used in all studies.

675 **RNA transfection.** HEK293 cells stably expressing pNLuc-UGA were plated at  $1.4 \times 10^4$   
676 cells/well in 96 well cell culture treated plates in Dulbecco's Modified Essential Medium (DMEM)  
677 supplemented with 10% FBS, 1% Pen/Step and 2mM L-Glutamine (Thermofisher, USA). 16-  
678 24hr later the cells were transfected with ACE-tRNAs using lipofectamine 2000 (ThermoFisher  
679 Scientific, USA). Briefly, 3μg of ACE-tRNA were suspended in 150μl of OptiMEM and 12μl of  
680 Lipofectamine 2000 was mixed with 150ul of OptiMEM. The volumes were combined,  
681 thoroughly mixed and incubated for 10 mins at RT. 75ul of the transfection complex was added  
682 to each well. PTC suppression by ACE-tRNA transcripts was quantified as described above.

683 **Expression in *Xenopus laevis* oocytes.** *Xenopus laevis* oocytes (stage V and VI) were  
684 purchased from Ecocyte (Austin, TX). Prior to injection, each ACE-tRNA pellet was  
685 resuspended in 2 μl of ddH<sub>2</sub>O and debris was pelleted at 21,000 x g, 4°C for 25 min. To  
686 determine dose response of ACE-tRNAs on CFTR channel rescue, we generated serial  
687 dilutions of ACE-tRNA aliquots (200, 100, 50, 25, 12.5, 6.25, 3.125 and 1.562 ng/oocyte)  
688 balanced in volume with ddH<sub>2</sub>O. In all experiments 25ng of CFTR cRNA was injected per oocyte  
689 and injection volumes were 50nl. ddH<sub>2</sub>O was used in no ACE-tRNA background control

690 experiments. After injection, oocytes were kept in OR-3 (50% Leibovitz's medium, 250 mg/l  
691 gentamycin, 1 mM L-glutamine, 10 mM HEPES (pH 7.6)) at 18°C for 36 hr.

692 **Two-electrode voltage clamp (TEVC) recordings.** CFTR Cl<sup>-</sup> currents were recorded in ND96  
693 bath solution that contained (in mM): 96 NaCl, 2 KCl, 1 MgCl<sub>2</sub>, and 5 HEPES (pH 7.5) in the  
694 presence of a maximal CFTR activation cocktail, forskolin (10μM; adenylate cyclase activator)  
695 and 3-isobutyl-1-methylxanthine (1mM; phosphodiesterase inhibitor). Glass microelectrodes  
696 backfilled with 3 M KCl had resistances of 0.5–2 MΩ. Data were filtered at 1 kHz and digitized  
697 at 10 kHz using a Digidata 1322A controlled by the pClamp 9.2 software (Molecular Devices,  
698 USA). CFTR currents were elicited using 5mV voltage steps from -60 to +35mV using an OC-  
699 725C voltage clamp amplifier (Warner Instruments, USA). Oocytes where the CFTR Cl<sup>-</sup> current  
700 reversed positive of -20mV were discarded. Clampfit 9.2 software was used for current analysis.  
701 All values are presented as mean ± SEM.

702

703

704 **Animals and *in vivo* imaging.** Nu/J mice were purchased from Jackson labs. Animal  
705 experiments were approved by the Institutional Animal Care and Use Committee at the  
706 Wistar Institute (protocol number: 112762). Mice were treated by injecting 10-20ug of DNA  
707 resuspended in 30ul of water into the tibialis anterior muscle followed by electroporation. We  
708 injected 10ug pNano-TGA + 10ug Arg ACE-tRNA (right tibialis anterior) or 10ug pNano-TGA +  
709 10ug empty pUC57 (left tibialis anterior) to 3 mice. As controls we injected 3 other mice with  
710 10ug pNano-WT (right tibialis anterior; positive control) or water (left tibialis anterior; negative  
711 control). The DNA was formulated with 333IU/ml of hyaluronidase (Sigma). One minute after  
712 DNA injection we proceeded to electroporation with CELLECTRA 3P device (Inovio  
713 Pharmaceuticals). We imaged nanoluciferase activity in mice by injecting 100ul of furimazine  
714 (40x dilution of Nano-Glo substrate) intraperitoneally and imaged mice on an IVIS Spectrum  
715 (Perkin Elmer) 5 minutes after injection. We imaged with open filter and acquired images at 40  
716 seconds. We analyzed the images using Living Image Software (Perkin Elmer).

717

718

719

## 720 REFERENCES

721

- 722 1. Maquat, L.E., Kinniburgh, A.J., Rachmilewitz, E.A. & Ross, J. Unstable beta-globin  
723 mRNA in mRNA-deficient beta o thalassemia. *Cell* **27**, 543-553 (1981).
- 724 2. Popp, M.W. & Maquat, L.E. Organizing principles of mammalian nonsense-mediated  
725 mRNA decay. *Annu Rev Genet* **47**, 139-165 (2013).
- 726 3. Chang, Y.F., Imam, J.S. & Wilkinson, M.F. The nonsense-mediated decay RNA  
727 surveillance pathway. *Annu Rev Biochem* **76**, 51-74 (2007).
- 728 4. Cheng, S.H. et al. Defective intracellular transport and processing of CFTR is the  
729 molecular basis of most cystic fibrosis. *Cell* **63**, 827-834 (1990).
- 730 5. Lefebvre, S. et al. Identification and characterization of a spinal muscular atrophy-  
731 determining gene. *Cell* **80**, 155-165 (1995).
- 732 6. Das, A.K. et al. Molecular genetics of palmitoyl-protein thioesterase deficiency in the  
733 U.S. *J Clin Invest* **102**, 361-370 (1998).

- 734 7. Chang, J.C. & Kan, Y.W. beta 0 thalassemia, a nonsense mutation in man. *Proc Natl*  
735 *Acad Sci U S A* **76**, 2886-2889 (1979).
- 736 8. Kalatzis, V. et al. Identification of 14 novel CTNS mutations and characterization of  
737 seven splice site mutations associated with cystinosis. *Hum Mutat* **20**, 439-446 (2002).
- 738 9. Pan, Y., Metzenberg, A., Das, S., Jing, B. & Gitschier, J. Mutations in the V2  
739 vasopressin receptor gene are associated with X-linked nephrogenic diabetes insipidus.  
740 *Nat Genet* **2**, 103-106 (1992).
- 741 10. Ballabio, A. & Gieselmann, V. Lysosomal disorders: from storage to cellular damage.  
742 *Biochim Biophys Acta* **1793**, 684-696 (2009).
- 743 11. Reiners, J., Nagel-Wolfrum, K., Jurgens, K., Marker, T. & Wolfrum, U. Molecular basis of  
744 human Usher syndrome: deciphering the meshes of the Usher protein network provides  
745 insights into the pathomechanisms of the Usher disease. *Exp Eye Res* **83**, 97-119  
746 (2006).
- 747 12. Gilad, S. et al. Ataxia-telangiectasia: founder effect among north African Jews. *Hum Mol*  
748 *Genet* **5**, 2033-2037 (1996).
- 749 13. Krawczak, M. et al. Human gene mutation database-a biomedical information and  
750 research resource. *Hum Mutat* **15**, 45-51 (2000).
- 751 14. Howard, M., Frizzell, R.A. & Bedwell, D.M. Aminoglycoside antibiotics restore CFTR  
752 function by overcoming premature stop mutations. *Nat Med* **2**, 467-469 (1996).
- 753 15. Arakawa, M. et al. Negamycin restores dystrophin expression in skeletal and cardiac  
754 muscles of mdx mice. *J Biochem* **134**, 751-758 (2003).
- 755 16. Welch, E.M. et al. PTC124 targets genetic disorders caused by nonsense mutations.  
756 *Nature* **447**, 87-91 (2007).
- 757 17. Singh, A., Ursic, D. & Davies, J. Phenotypic suppression and misreading  
758 *Saccharomyces cerevisiae*. *Nature* **277**, 146-148 (1979).
- 759 18. Palmer, E., Wilhelm, J.M. & Sherman, F. Phenotypic suppression of nonsense mutants  
760 in yeast by aminoglycoside antibiotics. *Nature* **277**, 148-150 (1979).
- 761 19. Burke, J.F. & Mogg, A.E. Suppression of a nonsense mutation in mammalian cells in  
762 vivo by the aminoglycoside antibiotics G-418 and paromomycin. *Nucleic Acids Res* **13**,  
763 6265-6272 (1985).
- 764 20. Du, M. et al. PTC124 is an orally bioavailable compound that promotes suppression of  
765 the human CFTR-G542X nonsense allele in a CF mouse model. *Proc Natl Acad Sci U S*  
766 *A* **105**, 2064-2069 (2008).
- 767 21. Roy, B. et al. Ataluren stimulates ribosomal selection of near-cognate tRNAs to promote  
768 nonsense suppression. *Proc Natl Acad Sci U S A* **113**, 12508-12513 (2016).
- 769 22. Kotecha, B. & Richardson, G.P. Ototoxicity in vitro: effects of neomycin, gentamicin,  
770 dihydrostreptomycin, amikacin, spectinomycin, neamine, spermine and poly-L-lysine.  
771 *Hear Res* **73**, 173-184 (1994).
- 772 23. Dai, W.J. et al. CRISPR-Cas9 for in vivo Gene Therapy: Promise and Hurdles. *Mol Ther*  
773 *Nucleic Acids* **5**, e349 (2016).
- 774 24. Peng, R., Lin, G. & Li, J. Potential pitfalls of CRISPR/Cas9-mediated genome editing.  
775 *FEBS J* **283**, 1218-1231 (2016).
- 776 25. Temple, G.F., Dozy, A.M., Roy, K.L. & Kan, Y.W. Construction of a functional human  
777 suppressor tRNA gene: an approach to gene therapy for beta-thalassaemia. *Nature* **296**,  
778 537-540 (1982).
- 779 26. Panchal, R.G., Wang, S., McDermott, J. & Link, C.J., Jr. Partial functional correction of  
780 xeroderma pigmentosum group A cells by suppressor tRNA. *Hum Gene Ther* **10**, 2209-  
781 2219 (1999).
- 782 27. Buvoli, M., Buvoli, A. & Leinwand, L.A. Suppression of nonsense mutations in cell  
783 culture and mice by multimerized suppressor tRNA genes. *Mol Cell Biol* **20**, 3116-3124  
784 (2000).

- 785 28. Lowe, T.M. & Chan, P.P. tRNAscan-SE On-line: integrating search and context for  
786 analysis of transfer RNA genes. *Nucleic Acids Res* **44**, W54-57 (2016).
- 787 29. Lowe, T.M. & Eddy, S.R. tRNAscan-SE: a program for improved detection of transfer  
788 RNA genes in genomic sequence. *Nucleic Acids Res* **25**, 955-964 (1997).
- 789 30. Lee, J.H., Skowron, P.M., Rutkowska, S.M., Hong, S.S. & Kim, S.C. Sequential  
790 amplification of cloned DNA as tandem multimers using class-II S restriction enzymes.  
791 *Genetic analysis : biomolecular engineering* **13**, 139-145 (1996).
- 792 31. Wang, H. et al. Improved seamless mutagenesis by recombineering using ccdB for  
793 counterselection. *Nucleic Acids Res* **42**, e37 (2014).
- 794 32. Dixon, A.S. et al. NanoLuc Complementation Reporter Optimized for Accurate  
795 Measurement of Protein Interactions in Cells. *ACS chemical biology* **11**, 400-408 (2016).
- 796 33. Pang, Y.L., Poruri, K. & Martinis, S.A. tRNA synthetase: tRNA aminoacylation and  
797 beyond. *Wiley Interdiscip Rev RNA* **5**, 461-480 (2014).
- 798 34. Hirsh, D. Tryptophan transfer RNA as the UGA suppressor. *J Mol Biol* **58**, 439-458  
799 (1971).
- 800 35. Smith, D. & Yarus, M. Transfer RNA structure and coding specificity. I. Evidence that a  
801 D-arm mutation reduces tRNA dissociation from the ribosome. *J Mol Biol* **206**, 489-501  
802 (1989).
- 803 36. Smith, D. & Yarus, M. Transfer RNA structure and coding specificity. II. A D-arm tertiary  
804 interaction that restricts coding range. *J Mol Biol* **206**, 503-511 (1989).
- 805 37. Dalphin, M.E., Brown, C.M., Stockwell, P.A. & Tate, W.P. The translational signal  
806 database, TransTerm, is now a relational database. *Nucleic Acids Res* **26**, 335-337  
807 (1998).
- 808 38. Brown, C.M., Dalphin, M.E., Stockwell, P.A. & Tate, W.P. The translational termination  
809 signal database. *Nucleic Acids Res* **21**, 3119-3123 (1993).
- 810 39. Major, L.L., Edgar, T.D., Yee Yip, P., Isaksson, L.A. & Tate, W.P. Tandem termination  
811 signals: myth or reality? *FEBS Lett* **514**, 84-89 (2002).
- 812 40. Wheeler, T.M. et al. Reversal of RNA dominance by displacement of protein  
813 sequestered on triplet repeat RNA. *Science* **325**, 336-339 (2009).
- 814 41. Wheeler, T.M., Lueck, J.D., Swanson, M.S., Dirksen, R.T. & Thornton, C.A. Correction of  
815 CIC-1 splicing eliminates chloride channelopathy and myotonia in mouse models of  
816 myotonic dystrophy. *J Clin Invest* **117**, 3952-3957 (2007).
- 817 42. Muthumani, K. et al. Novel prostate cancer immunotherapy with a DNA-encoded anti-  
818 prostate-specific membrane antigen monoclonal antibody. *Cancer Immunol Immunother*  
819 **66**, 1577-1588 (2017).
- 820 43. Bladen, C.L. et al. The TREAT-NMD DMD Global Database: analysis of more than 7,000  
821 Duchenne muscular dystrophy mutations. *Hum Mutat* **36**, 395-402 (2015).
- 822 44. Brown, C.M., Stockwell, P.A., Trotman, C.N. & Tate, W.P. Sequence analysis suggests  
823 that tetra-nucleotides signal the termination of protein synthesis in eukaryotes. *Nucleic  
824 Acids Res* **18**, 6339-6345 (1990).
- 825 45. Sachs, M.S. et al. Toeprint analysis of the positioning of translation apparatus  
826 components at initiation and termination codons of fungal mRNAs. *Methods* **26**, 105-114  
827 (2002).
- 828 46. Amrani, N. et al. A faux 3'-UTR promotes aberrant termination and triggers nonsense-  
829 mediated mRNA decay. *Nature* **432**, 112-118 (2004).
- 830 47. Bengtson, M.H. & Joazeiro, C.A. Role of a ribosome-associated E3 ubiquitin ligase in  
831 protein quality control. *Nature* **467**, 470-473 (2010).
- 832 48. Crowder, J.J. et al. Rkr1/Ltn1 Ubiquitin Ligase-mediated Degradation of Translationally  
833 Stalled Endoplasmic Reticulum Proteins. *J Biol Chem* **290**, 18454-18466 (2015).
- 834 49. Rowe, S.M., Miller, S. & Sorscher, E.J. Cystic fibrosis. *The New England journal of  
835 medicine* **352**, 1992-2001 (2005).



- 836 50. Manuvakhova, M., Keeling, K. & Bedwell, D.M. Aminoglycoside antibiotics mediate  
837 context-dependent suppression of termination codons in a mammalian translation  
838 system. *RNA* **6**, 1044-1055 (2000).
- 839 51. Bonetti, B., Fu, L., Moon, J. & Bedwell, D.M. The efficiency of translation termination is  
840 determined by a synergistic interplay between upstream and downstream sequences in  
841 *Saccharomyces cerevisiae*. *J Mol Biol* **251**, 334-345 (1995).
- 842 52. Xue, X. et al. Synthetic aminoglycosides efficiently suppress cystic fibrosis  
843 transmembrane conductance regulator nonsense mutations and are enhanced by  
844 ivacaftor. *American journal of respiratory cell and molecular biology* **50**, 805-816 (2014).
- 845 53. Gogakos, T. et al. Characterizing Expression and Processing of Precursor and Mature  
846 Human tRNAs by Hydro-tRNAseq and PAR-CLIP. *Cell Rep* **20**, 1463-1475 (2017).
- 847 54. Geslain, R. & Pan, T. Functional analysis of human tRNA isodecoders. *J Mol Biol* **396**,  
848 821-831 (2010).
- 849 55. Ingolia, N.T., Brar, G.A., Rouskin, S., McGeachy, A.M. & Weissman, J.S. The ribosome  
850 profiling strategy for monitoring translation in vivo by deep sequencing of ribosome-  
851 protected mRNA fragments. *Nat Protoc* **7**, 1534-1550 (2012).
- 852 56. Kim, D., Langmead, B. & Salzberg, S.L. HISAT: a fast spliced aligner with low memory  
853 requirements. *Nat Methods* **12**, 357-360 (2015).
- 854 57. Ingolia, N.T., Ghaemmighami, S., Newman, J.R. & Weissman, J.S. Genome-wide  
855 analysis in vivo of translation with nucleotide resolution using ribosome profiling. *Science*  
856 **324**, 218-223 (2009).
- 857 58. Guydosh, N.R. & Green, R. Dom34 rescues ribosomes in 3' untranslated regions. *Cell*  
858 **156**, 950-962 (2014).
- 859 59. Afgan, E. et al. The Galaxy platform for accessible, reproducible and collaborative  
860 biomedical analyses: 2016 update. *Nucleic Acids Res* **44**, W3-W10 (2016).
- 861
